# Supplementary material
Source: PubMed Central journal article supplement (PMC4014286)
Supplement: supp_M113.029538_mcp.M113.029538-1.pdf [file supp_M113.029538_mcp.M113.029538-1.pdf]

**Supplementary Table S1.** Oligonucleotides designed and used in this study.

**Supplementary Table S2.** Proteins identified by iTRAQ-2D-LC/MS/MS in cell envelopes derived from GC strains FA1090, F62, MS11, and 1291.

**Supplementary Table S3.** Proteins identified by iTRAQ-2D-LC/MS/MS in naturally released MVs derived from GC strains FA1090, F62, MS11, and 1291.

**Supplementary Table S4.** Common proteins identified by iTRAQ-2D-LC/MS/MS in both biological experiments in cell envelopes derived from GC strains FA1090, F62, MS11, and 1291.

**Supplementary Table S5.** Common proteins identified by iTRAQ-2D-LC/MS/MS in both biological experiments in MVs naturally released from GC strains FA1090, F62, MS11, and 1291.

**Supplementary Material S1.** Unprocessed and unfiltered results from Protein Pilot obtained in the proteomic analysis of the cell envelope fraction in experiment 1.

**Supplementary Material S2.** Unprocessed and unfiltered results from Protein Pilot obtained in the proteomic analysis of the cell envelope fraction in experiment 2.

**Supplementary Material S3.** Unprocessed and unfiltered results from Protein Pilot obtained in the proteomic analysis of the native MVs in experiment 1.

**Supplementary Material S4.** Unprocessed and unfiltered results from Protein Pilot obtained in the proteomic analysis of the native MVs in experiment 2.
