# Supplementary material
Source: PubMed Central journal article supplement (PMC4014286)
Supplement: supp_M113.029538_mcp.M113.029538-2.pdf [file supp_M113.029538_mcp.M113.029538-2.pdf]

**Supplementary Table S1 – Oligonucleotides designed and used in this study.**

| Name                                                                       | Sequence (5' → 3')                 | Restriction enzyme/<br>Product length (bp) |
|----------------------------------------------------------------------------|------------------------------------|--------------------------------------------|
| NGO2139-up-F                                                               | AAGCCTGAATTCCGACTGGTGGAAACAAAAC    | <i>EcoRI, KpnI, 543</i>                    |
| NGO2139-up-R                                                               | ATCCGCGGTACCGGTTTTGAAGAAGGTTTTTC   |                                            |
| NGO2139-down-F                                                             | GCTCAGGGATCCATGAAGGCGCAGCCAAAT     | <i>BamHI, HindIII, 548</i>                 |
| NGO2139-down-R                                                             | GATTCGAAGCTTGCTTCGGAAACGGATTATAC   |                                            |
| NGO2121-up-F                                                               | AGTCCTGAATTCCGTCAATATGGACTTTACC    | <i>EcoRI, KpnI, 543</i>                    |
| NGO2121-up-R                                                               | ATCCGCGGTACCCGTAGGCGGTTTTTTTTTC    |                                            |
| NGO2121-down-F                                                             | GCTCAGGGATCCGCAACCTGGAACACAACCC    | <i>BamHI, HindIII, 512</i>                 |
| NGO2121-down-R                                                             | GATTCGAAGCTTGAAGGCTTCGCGGGCAAG     |                                            |
| NGO2111-up-F                                                               | AGTCCTGAATTCAATGCCGGATGTGTTTTGCG   | <i>EcoRI, KpnI, 558</i>                    |
| NGO2111-up-R                                                               | ATCCGCGGTACCAAACGCCGCAAGCCCCA      |                                            |
| NGO2111-down-F                                                             | GCTCAGGGTACCTCGGCGGATTGGCGGTTT     | <i>BamHI, HindIII, 547</i>                 |
| NGO2111-down-R                                                             | GATTCGAAGCTTTTCAGACGGCATCAGCCTG    |                                            |
| NGO1985-up-F                                                               | CTATCGATGAGCTCTGCCGACGCGCAACACTT   | <i>SacI, KpnI, 512</i>                     |
| NGO1985-up-R                                                               | ATCCGCGGTACCCGGTGTGTGGTTTTGGTTTTTC |                                            |
| NGO1985-down-F                                                             | GCTCAGGGATCCCCAAAACACTACGTCCAACGC  | <i>BamHI, HindIII, 522</i>                 |
| NGO1985-down-R                                                             | GATTCGAAGCTTGGGCGTTTGTGGGCAGTA     |                                            |
| NGO1955-up-F                                                               | AGTCCTGAATTCTCTGCCCGCGCAGGTTAT     | <i>EcoRI, KpnI, 544</i>                    |
| NGO1955-up-R                                                               | ATCCGCGGTACCCTGTCCGGTGTGGTATCCGT   |                                            |
| NGO1955-down-F                                                             | GCTCAGGGATCCGGAAACGGCAAAGGGAAA     | <i>BamHI, HindIII, 524</i>                 |
| NGO1955-down-R                                                             | GATTCGAAGCTTCGAAGGGCGCATTATGGT     |                                            |
| NGO1344-up-F                                                               | AGTCCTGAATTCTTCCGCCAACCGTCTG       | <i>EcoRI, KpnI, 580</i>                    |
| NGO1344-up-R                                                               | ATCCGCGGTACCGTGGAACCCGATAATAAATCC  |                                            |
| NGO1344-down-F                                                             | ATGTAAGTCTGCAGGCTCAAACCTAAAGAACCG  | <i>BamHI, HindIII, 548</i>                 |
| NGO1344-down-R                                                             | GATTCGAAGCTTAGCAGTTCTCCGAAATCA     |                                            |
| Primers used to verify in-frame deletion mutants                           |                                    |                                            |
| NGO2139-check-F                                                            | TCTTCGTAACCTCCAGCCGC               |                                            |
| NGO2139-check-R                                                            | CTATAATAGCCGTTTTGCCG               |                                            |
| NGO2121-check-F                                                            | GGCAACCCTTGGCGTAC                  |                                            |
| NGO2121-check-R                                                            | GGCGGCATGAAAACCTGCAA               |                                            |
| NGO2111-check-F                                                            | GATAAAGATGCGGCTGCCG                |                                            |
| NGO2111-check-R                                                            | ACTGCGCCCCGATTTTCG                 |                                            |
| NGO1985-check-F                                                            | AAATCGCCCTTGATACCG                 |                                            |
| NGO1985-check-R                                                            | ACACTTTATGCTTCCGGCTC               |                                            |
| NGO1955-check-F                                                            | GGCGGAATTTCTCGCAG                  |                                            |
| NGO1955-check-R                                                            | CATTCTTTGTCAAACGACGCGC             |                                            |
| NGO1344-check-F                                                            | CGGCAGAATGGTGCTTGTC                |                                            |
| NGO1344-check-R                                                            | AAACGAAACCGCGTTGGAAG               |                                            |
| Primers used to create complemented strain $\Delta ngo1985/P_{lac}ngo1985$ |                                    |                                            |
